# Supplementary material
Source: publisher site journal article supplement (https://www.dovepress.com/article/350396)

## SUPPLEMENTARY MATERIALS

*Supplementary table 1: STROBE Statement—Checklist of items that should be included in reports of cohort studies*

|                              | Item No | Recommendation                                                                                                                                                                                                                                                                                                                         | Page No     |
|------------------------------|---------|----------------------------------------------------------------------------------------------------------------------------------------------------------------------------------------------------------------------------------------------------------------------------------------------------------------------------------------|-------------|
| <b>Title and abstract</b>    | 1       | (a) Indicate the study's design with a commonly used term in the title or the abstract                                                                                                                                                                                                                                                 | 1           |
|                              |         | (b) Provide in the abstract an informative and balanced summary of what was done and what was found                                                                                                                                                                                                                                    | 2           |
| <b>Introduction</b>          |         |                                                                                                                                                                                                                                                                                                                                        |             |
| Background/rationale         | 2       | Explain the scientific background and rationale for the investigation being reported                                                                                                                                                                                                                                                   | 3-4         |
| Objectives                   | 3       | State specific objectives, including any prespecified hypotheses                                                                                                                                                                                                                                                                       | 4           |
| <b>Methods</b>               |         |                                                                                                                                                                                                                                                                                                                                        |             |
| Study design                 | 4       | Present key elements of study design early in the paper                                                                                                                                                                                                                                                                                | 4           |
| Setting                      | 5       | Describe the setting, locations, and relevant dates, including periods of recruitment, exposure, follow-up, and data collection                                                                                                                                                                                                        | 4           |
| Participants                 | 6       | (a) Give the eligibility criteria, and the sources and methods of selection of participants. Describe methods of follow-up<br><br>(b) For matched studies, give matching criteria and number of exposed and unexposed                                                                                                                  | 5           |
| Variables                    | 7       | Clearly define all outcomes, exposures, predictors, potential confounders, and effect modifiers. Give diagnostic criteria, if applicable                                                                                                                                                                                               | 7-8         |
| Data sources/<br>measurement | 8*      | For each variable of interest, give sources of data and details of methods of assessment (measurement). Describe comparability of assessment methods if there is more than one group                                                                                                                                                   | 4           |
| Bias                         | 9       | Describe any efforts to address potential sources of bias                                                                                                                                                                                                                                                                              | 5-6 & 16-17 |
| Study size                   | 10      | Explain how the study size was arrived at                                                                                                                                                                                                                                                                                              | 10-12       |
| Quantitative variables       | 11      | Explain how quantitative variables were handled in the analyses. If applicable, describe which groupings were chosen and why                                                                                                                                                                                                           | 10-13       |
| Statistical methods          | 12      | (a) Describe all statistical methods, including those used to control for confounding<br><br>(b) Describe any methods used to examine subgroups and interactions<br><br>(c) Explain how missing data were addressed<br><br>(d) If applicable, explain how loss to follow-up was addressed<br><br>(e) Describe any sensitivity analyses | 8-9         |

| <b>Results</b>           |     |                                                                                                                                                                                                                                                                                                                                                                                                                       |                                                     |
|--------------------------|-----|-----------------------------------------------------------------------------------------------------------------------------------------------------------------------------------------------------------------------------------------------------------------------------------------------------------------------------------------------------------------------------------------------------------------------|-----------------------------------------------------|
| Participants             | 13* | (a) Report numbers of individuals at each stage of study—eg numbers potentially eligible, examined for eligibility, confirmed eligible, included in the study, completing follow-up, and analysed<br><br>(b) Give reasons for non-participation at each stage<br><br>(c) Consider use of a flow diagram                                                                                                               | 10-13<br><br>Provided within Supplementary material |
| Descriptive data         | 14* | (a) Give characteristics of study participants (eg demographic, clinical, social) and information on exposures and potential confounders<br><br><br><br>(b) Indicate number of participants with missing data for each variable of interest<br><br>(c) Summarise follow-up time (eg, average and total amount)                                                                                                        | Page.11<br><br>Also provided in tables              |
| Outcome data             | 15* | Report numbers of outcome events or summary measures over time                                                                                                                                                                                                                                                                                                                                                        | 11-13                                               |
| Main results             | 16  | (a) Give unadjusted estimates and, if applicable, confounder-adjusted estimates and their precision (eg, 95% confidence interval). Make clear which confounders were adjusted for and why they were included<br><br>(b) Report category boundaries when continuous variables were categorized<br><br>(c) If relevant, consider translating estimates of relative risk into absolute risk for a meaningful time period | In Figures. Page.14                                 |
| Other analyses           | 17  | Report other analyses done—eg analyses of subgroups and interactions, and sensitivity analyses                                                                                                                                                                                                                                                                                                                        | 13                                                  |
| <b>Discussion</b>        |     |                                                                                                                                                                                                                                                                                                                                                                                                                       |                                                     |
| Key results              | 18  | Summarise key results with reference to study objectives                                                                                                                                                                                                                                                                                                                                                              | 14                                                  |
| Limitations              | 19  | Discuss limitations of the study, taking into account sources of potential bias or imprecision. Discuss both direction and magnitude of any potential bias                                                                                                                                                                                                                                                            | 16-17                                               |
| Interpretation           | 20  | Give a cautious overall interpretation of results considering objectives, limitations, multiplicity of analyses, results from similar studies, and other relevant evidence                                                                                                                                                                                                                                            | 14-17                                               |
| Generalisability         | 21  | Discuss the generalisability (external validity) of the study results                                                                                                                                                                                                                                                                                                                                                 | 14                                                  |
| <b>Other information</b> |     |                                                                                                                                                                                                                                                                                                                                                                                                                       |                                                     |
| Funding                  | 22  | Give the source of funding and the role of the funders for the present study and, if applicable, for the original study on which the present article is based                                                                                                                                                                                                                                                         | 18                                                  |

\*Give information separately for cases and controls in case-control studies and, if applicable, for exposed and unexposed groups in cohort and cross-sectional studies.

*Supplementary table 2: Read code definition for exposure record  
Memory Concern*

| <b>Read code</b>      | <b>description</b>                         | <b>Code list</b> |
|-----------------------|--------------------------------------------|------------------|
| <b>Memory Concern</b> |                                            |                  |
| 1B1A.00               | Memory loss - amnesia                      | Included         |
| 1B1A.11               | Amnesia symptom                            | Included         |
| 1B1A.12               | Memory loss symptom                        | Included         |
| 1B1A.13               | Memory disturbance                         | Included         |
| 1B1A100               | Short-term memory loss                     | Included         |
| 1B1S.00               | Transient global amnesia                   | Included         |
| 1B1W.00               | Transient epileptic amnesia                | Included         |
| 1S23.00               | Memory impairment                          | Included         |
| 28G..00               | Forgetful                                  | Included         |
| E201700               | Hysterical amnesia                         | Included         |
| E2A1000               | Mild memory disturbance                    | Included         |
| Eu44000               | [X]Dissociative amnesia                    | Included         |
| G655.00               | Transient global amnesia                   | Included         |
| R00z000               | [D]Amnesia (retrograde)                    | Included         |
| R00z011               | [D]Memory deficit                          | Included         |
| R00z500               | [D]Anterograde amnesia                     | Included         |
| Ryu5000               | [X]Other amnesia                           | Included         |
| Z7CE400               | Memory disturbance (& amnesia (& symptom)) | Included         |
| Z7CE412               | Memory loss symptom                        | Included         |
| Z7CE500               | Forgetful                                  | Included         |
| Z7CE600               | Amnesia                                    | Included         |
| Z7CE611               | Memory loss                                | Included         |
| Z7CE614               | Memory loss - amnesia                      | Included         |
| Z7CE615               | Loss of memory                             | Included         |
| Z7CE616               | LOM - Loss of memory                       | Included         |
| Z7CE700               | Transient global amnesia                   | Included         |
| Z7CE711               | TGA - Transient global amnesia             | Included         |
| Z7CE800               | Anterograde amnesia                        | Included         |
| Z7CE811               | Antegrade amnesia                          | Included         |
| Z7CE900               | Retrograde amnesia                         | Included         |
| Z7CEC11               | Loss of memory for recent events           | Included         |
| Z7CEH00               | Memory impairment                          | Included         |
| Z7CEH11               | Memory dysfunction                         | Included         |
| Z7CEH12               | Memory deficit                             | Included         |
| Z7CEH13               | Bad memory                                 | Included         |
| Z7CEH14               | Memory problem                             | Included         |
| Z7CEH15               | Poor memory                                | Included         |

|         |                         |          |
|---------|-------------------------|----------|
| Z7CEJ00 | Memory lapses           | Included |
| Z7CEK00 | Minor memory lapses     | Included |
| Z7CEL00 | Mild memory disturbance | Included |
| Z7CF800 | Poor short-term memory  | Included |
| Z7CF811 | Short-term memory loss  | Included |
| Z7CF000 | Poor long-term memory   | Included |
| Z7CF011 | Long-term memory loss   | Included |

*Supplementary Table 3: Read code definition for exposure record  
Cognitive Decline*

| <b>Read code</b>         | <b>description</b>                                            | <b>Code list</b> |
|--------------------------|---------------------------------------------------------------|------------------|
| <b>Cognitive decline</b> |                                                               |                  |
| 28E..00                  | Cognitive decline                                             | Included         |
| 28E0.00                  | mild cognitive impairment                                     | Included         |
| 28E1.00                  | Moderate cognitive impairment                                 | Included         |
| 28E2.00                  | Severe cognitive impairment                                   | Included         |
| 28E3.00                  | Cognitive impairment                                          | Included         |
| 3AE1.00                  | GDS level 2 - very mild cognitive decline                     | Included         |
| 3AE2.00                  | GDS level 3 - mild cognitive decline                          | Included         |
| 3AE3.00                  | GDS level 4 - moderate cognitive decline                      | Included         |
| 3AE4.00                  | GDS level 5 - moderately severe cognitive decline             | Included         |
| 3AE5.00                  | GDS level 6 - severe cognitive decline                        | Included         |
| 6AQ..00                  | mild cognitive impairment review                              | Included         |
| E2A1100                  | Organic memory impairment                                     | Included         |
| Eu05700                  | [X]Mild cognitive disorder                                    | Included         |
| Z7C1.00                  | Impaired cognition                                            | Included         |
| ZRLfE00                  | Health of the Nation Outcome Scale item 4 - cognitive problem | Included         |
| ZS3..00                  | Language-related cognitive disorder                           | Included         |

*Supplementary table 4: Read code definition for Outcome Dementia*

| <b>Read code</b> | <b>description</b>                                           | <b>Code list</b> |
|------------------|--------------------------------------------------------------|------------------|
| <b>Dementia</b>  |                                                              |                  |
| F112.00          | senile degeneration of brain                                 | Included         |
| 1JA2.00          | suspected dementia                                           | Included         |
| 66h..00          | dementia monitoring                                          | Included         |
| 6AB..00          | dementia annual review                                       | Included         |
| 8BM0200          | dementia medication review                                   | Included         |
| 8CMG200          | review of dementia advance care plan                         | Included         |
| 8CMZ.00          | dementia care plan                                           | Included         |
| 8CMZ000          | dementia care plan agreed                                    | Included         |
| 8CMZ100          | dementia care plan reviewed                                  | Included         |
| 8CMZ200          | dementia care plan declined                                  | Included         |
| 8CMZ300          | dementia care plan review declined                           | Included         |
| 8CMe000          | dementia advance care plan                                   | Included         |
| 8CSA.00          | dementia advance care plan agreed                            | Included         |
| 8IAe000          | dementia advance care plan declined                          | Included         |
| 8IAe200          | dementia advance care plan review declined                   | Included         |
| 90u..00          | dementia monitoring administration                           | Included         |
| 90u1.00          | dementia monitoring first letter                             | Included         |
| 90u2.00          | dementia monitoring second letter                            | Included         |
| 90u3.00          | dementia monitoring third letter                             | Included         |
| 90u4.00          | dementia monitoring verbal invite                            | Included         |
| 90u5.00          | dementia monitoring telephone invite                         | Included         |
| 9hD..00          | exception reporting: dementia quality indicators             | Included         |
| 9hD0.00          | excepted from dementia quality indicators: patient unsuitabl | Included         |
| 9hD1.00          | excepted from dementia quality indicators: informed dissent  | Included         |
| E00..11          | senile dementia                                              | Included         |
| E00..12          | senile/presenile dementia                                    | Included         |
| E000.00          | uncomplicated senile dementia                                | Included         |

|         |                                                             |          |
|---------|-------------------------------------------------------------|----------|
| E002.00 | senile dementia with depressive or paranoid features        | Included |
| E002000 | senile dementia with paranoia                               | Included |
| E002100 | senile dementia with depression                             | Included |
| E002z00 | senile dementia with depressive or paranoid features nos    | Included |
| E003.00 | senile dementia with delirium                               | Included |
| E004.00 | arteriosclerotic dementia                                   | Included |
| E004.11 | multi infarct dementia                                      | Included |
| E004000 | uncomplicated arteriosclerotic dementia                     | Included |
| E004100 | arteriosclerotic dementia with delirium                     | Included |
| E004200 | arteriosclerotic dementia with paranoia                     | Included |
| E004300 | arteriosclerotic dementia with depression                   | Included |
| E004z00 | arteriosclerotic dementia nos                               | Included |
| E041.00 | dementia in conditions ec                                   | Included |
| Eu00.00 | [x]dementia in alzheimer's disease                          | Included |
| Eu00013 | [x]alzheimer's disease type 2                               | Included |
| Eu00100 | [x]dementia in alzheimer's disease with late onset          | Included |
| Eu00112 | [x]senile dementia,alzheimer's type                         | Included |
| Eu00113 | [x]primary degen dementia of alzheimer's type, senile onset | Included |
| Eu00200 | [x]dementia in alzheimer's dis, atypical or mixed type      | Included |
| Eu00z00 | [x]dementia in alzheimer's disease, unspecified             | Included |
| Eu00z11 | [x]alzheimer's dementia unspec                              | Included |
| Eu01.00 | [x]vascular dementia                                        | Included |
| Eu01.11 | [x]arteriosclerotic dementia                                | Included |
| Eu01000 | [x]vascular dementia of acute onset                         | Included |
| Eu01100 | [x]multi-infarct dementia                                   | Included |
| Eu01111 | [x]predominantly cortical dementia                          | Included |
| Eu01200 | [x]subcortical vascular dementia                            | Included |
| Eu01300 | [x]mixed cortical and subcortical vascular dementia         | Included |
| Eu01y00 | [x]other vascular dementia                                  | Included |
| Eu01z00 | [x]vascular dementia, unspecified                           | Included |

|         |                                                           |          |
|---------|-----------------------------------------------------------|----------|
| Eu02.00 | [x]dementia in other diseases classified elsewhere        | Included |
| Eu02y00 | [x]dementia in other specified diseases classif elsewhere | Included |
| Eu02z00 | [x] unspecified dementia                                  | Included |
| Eu02z13 | [x] primary degenerative dementia nos                     | Included |
| Eu02z14 | [x] senile dementia nos                                   | Included |
| Eu02z16 | [x] senile dementia, depressed or paranoid type           | Included |
| Eu04100 | [x]delirium superimposed on dementia                      | Included |
| F110.00 | alzheimer's disease                                       | Included |
| F110100 | alzheimer's disease with late onset                       | Included |
| Fyu3000 | [x]other alzheimer's disease                              | Included |
| ZS7C500 | language disorder of dementia                             | Included |

Supplementary figure 1. Lewis plots of incidence rate for events after registration.

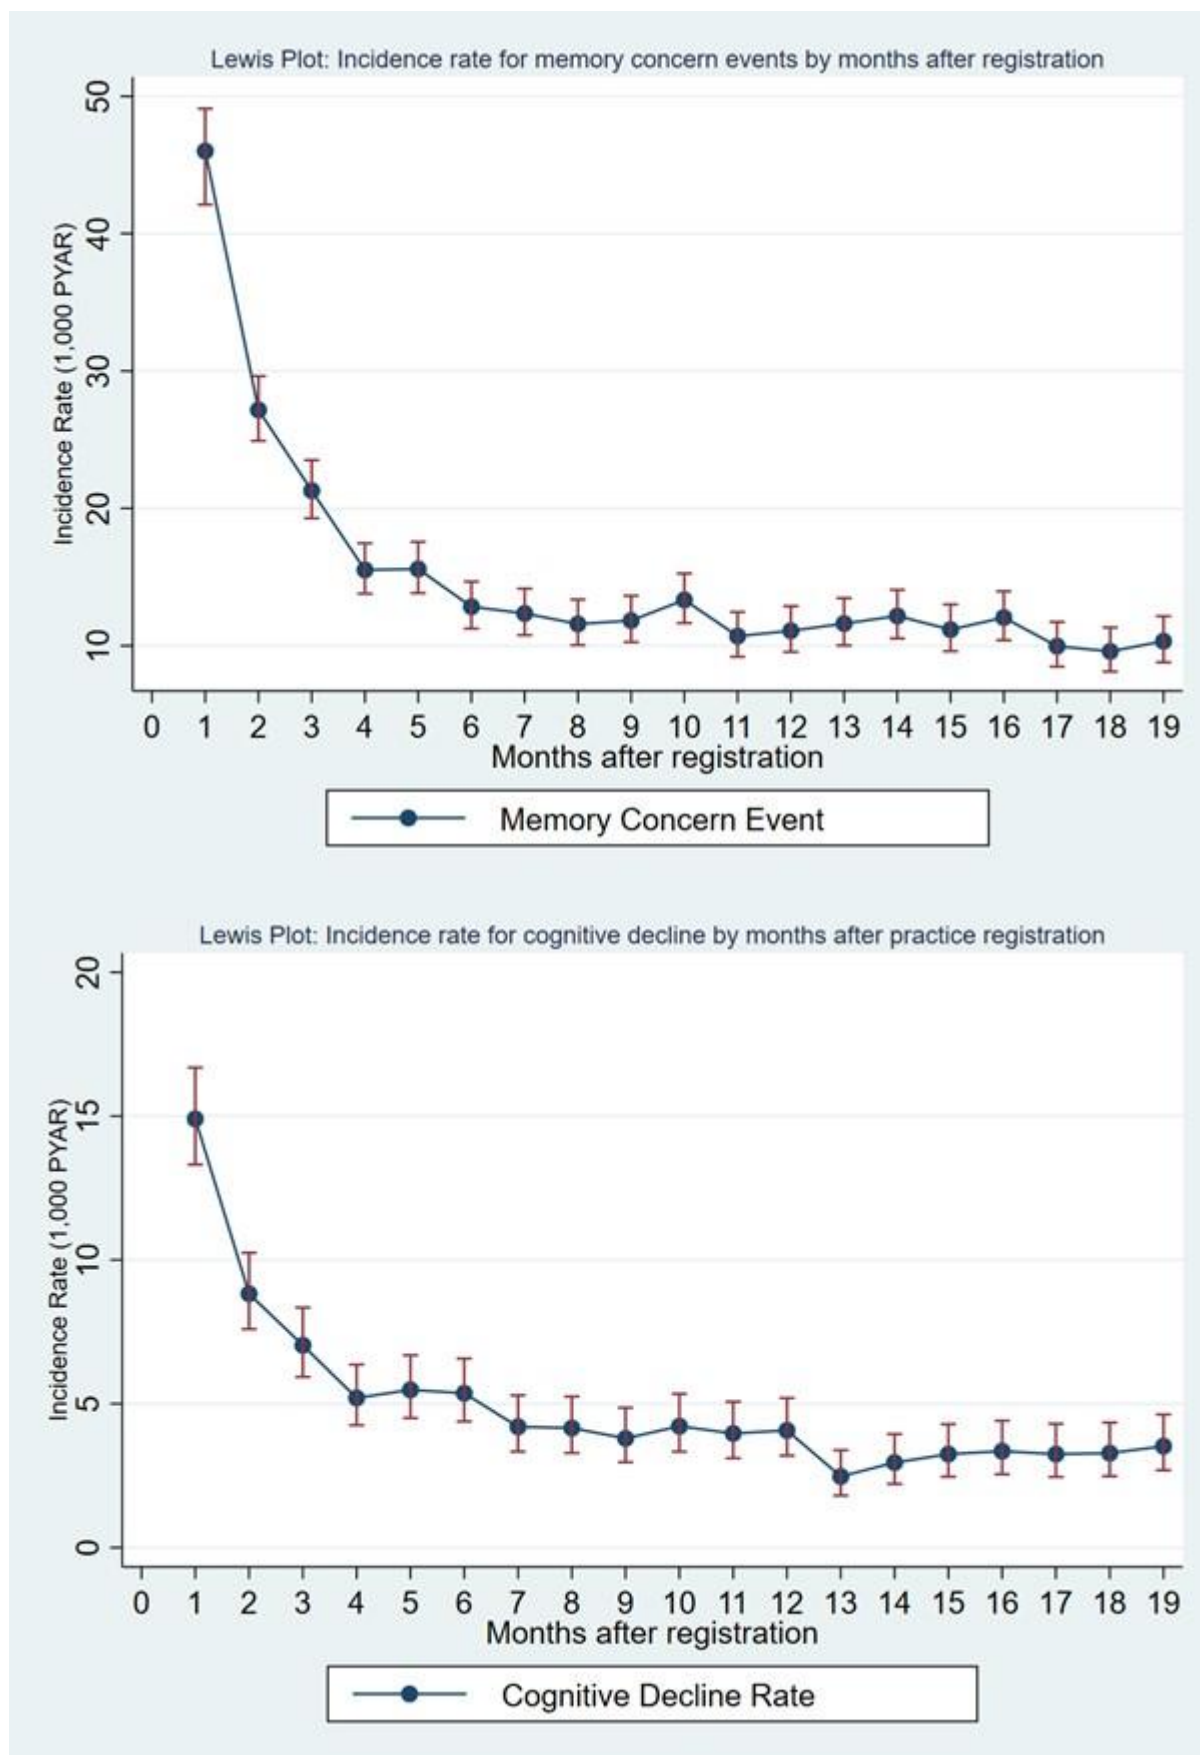



Supplementary figure 2: Percentage (%) of Read codes used (by ageband) for case definition of Memory Concern

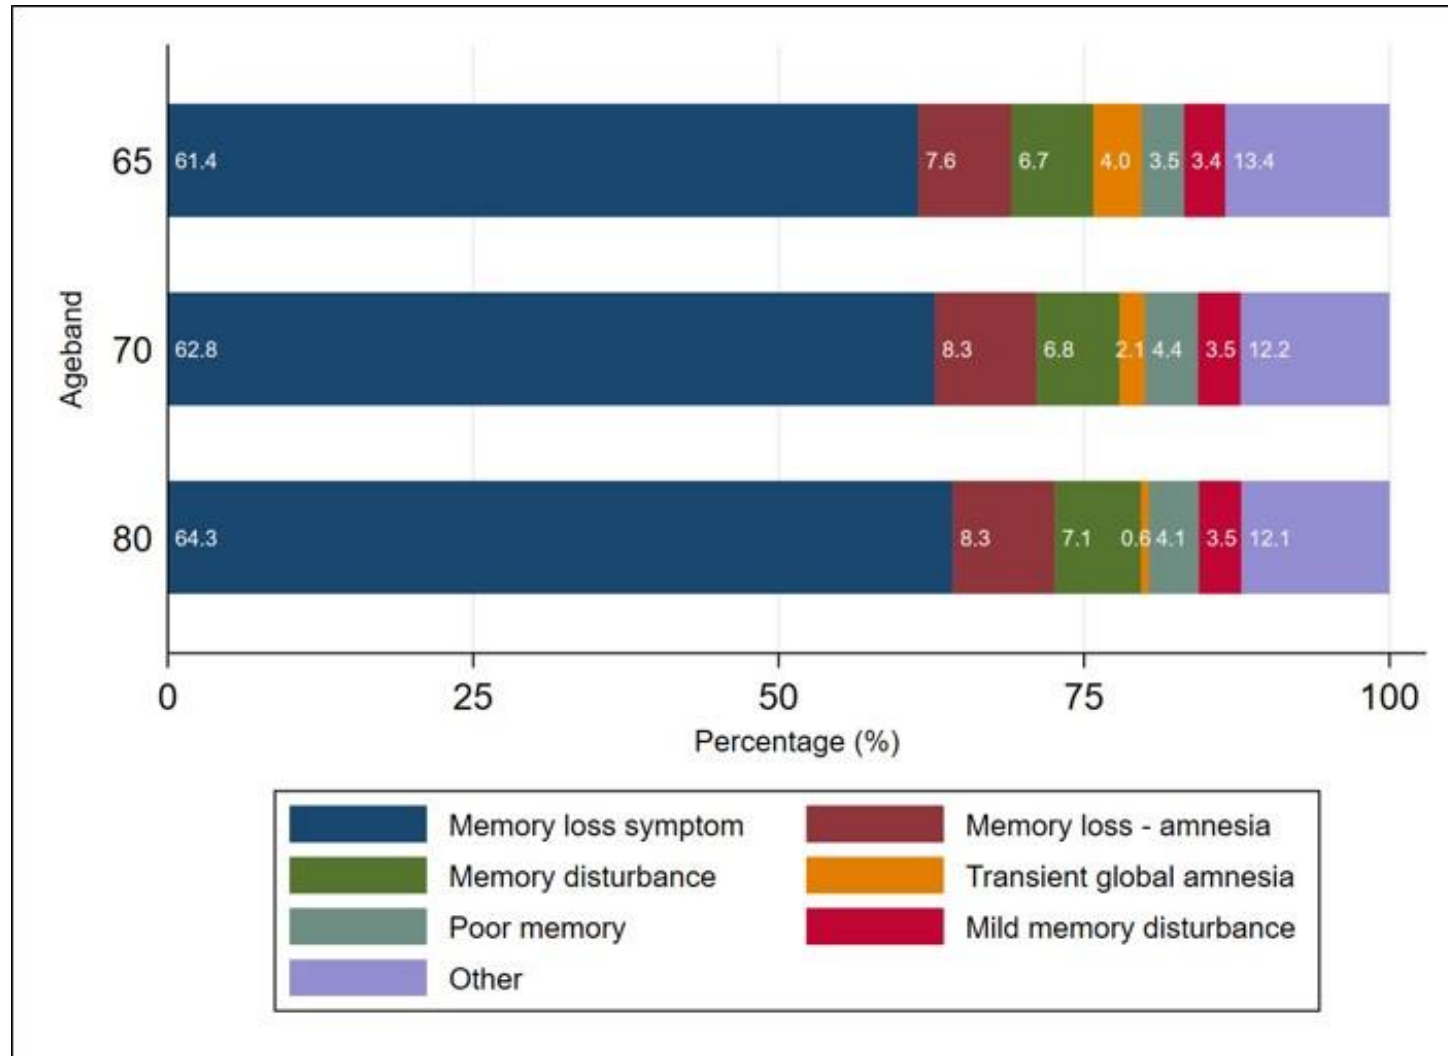

Supplementary figure 3: Percentage (%) of Read codes used (by ageband) for case definition of Cognitive Decline

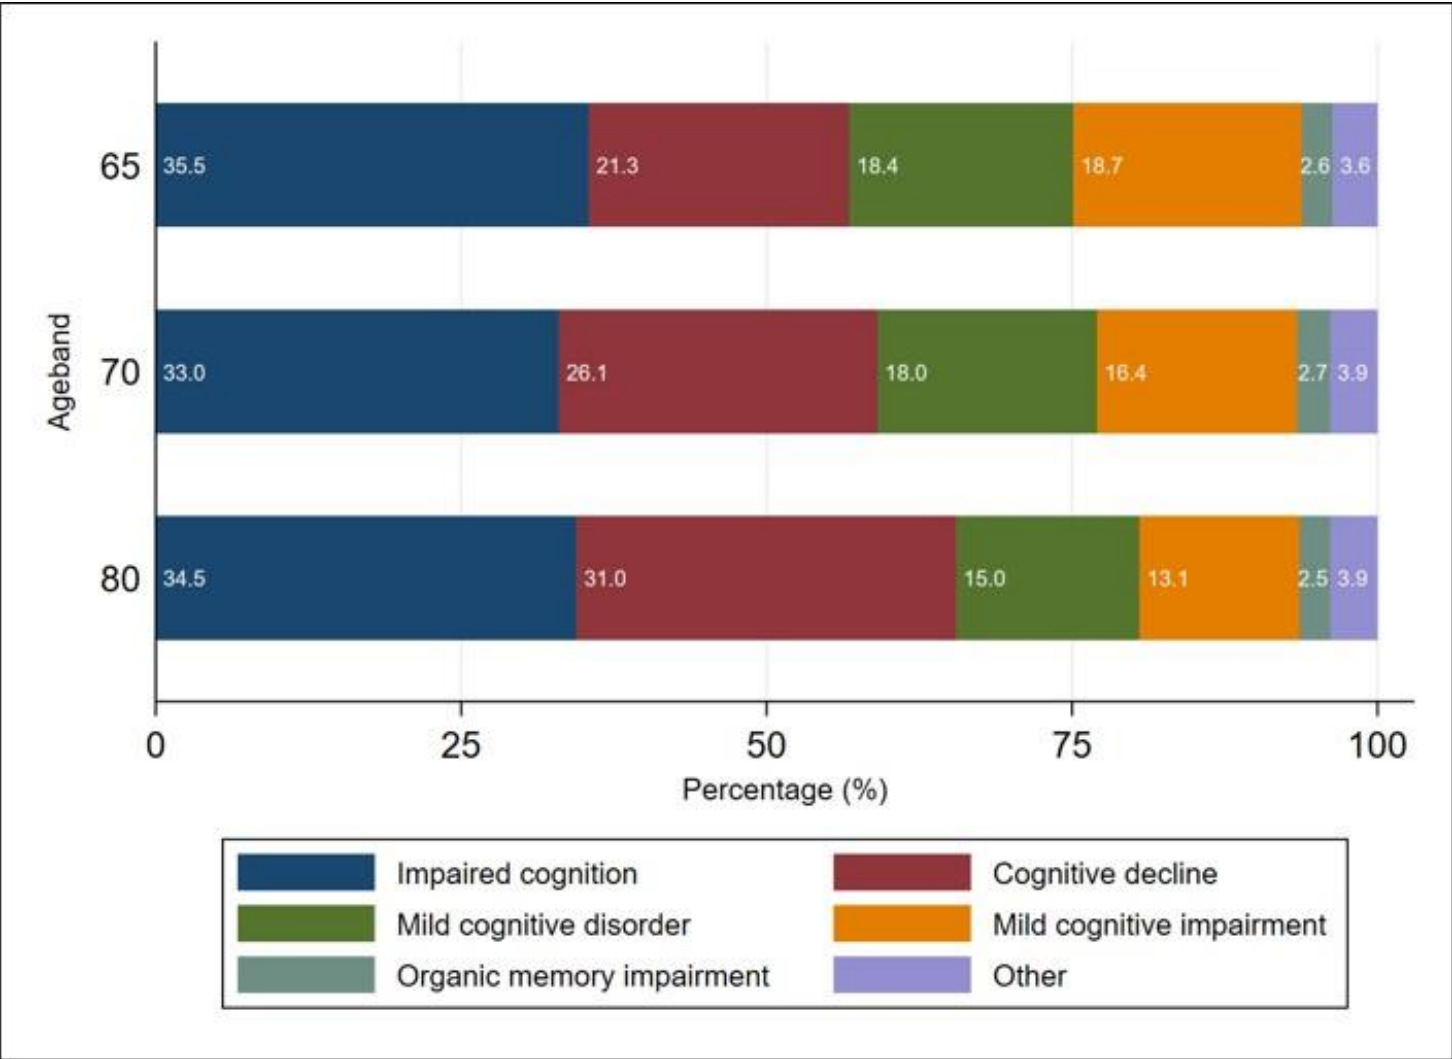

Supplementary Figure 4: flowchart of Participant selection based on Survival analysis criteria

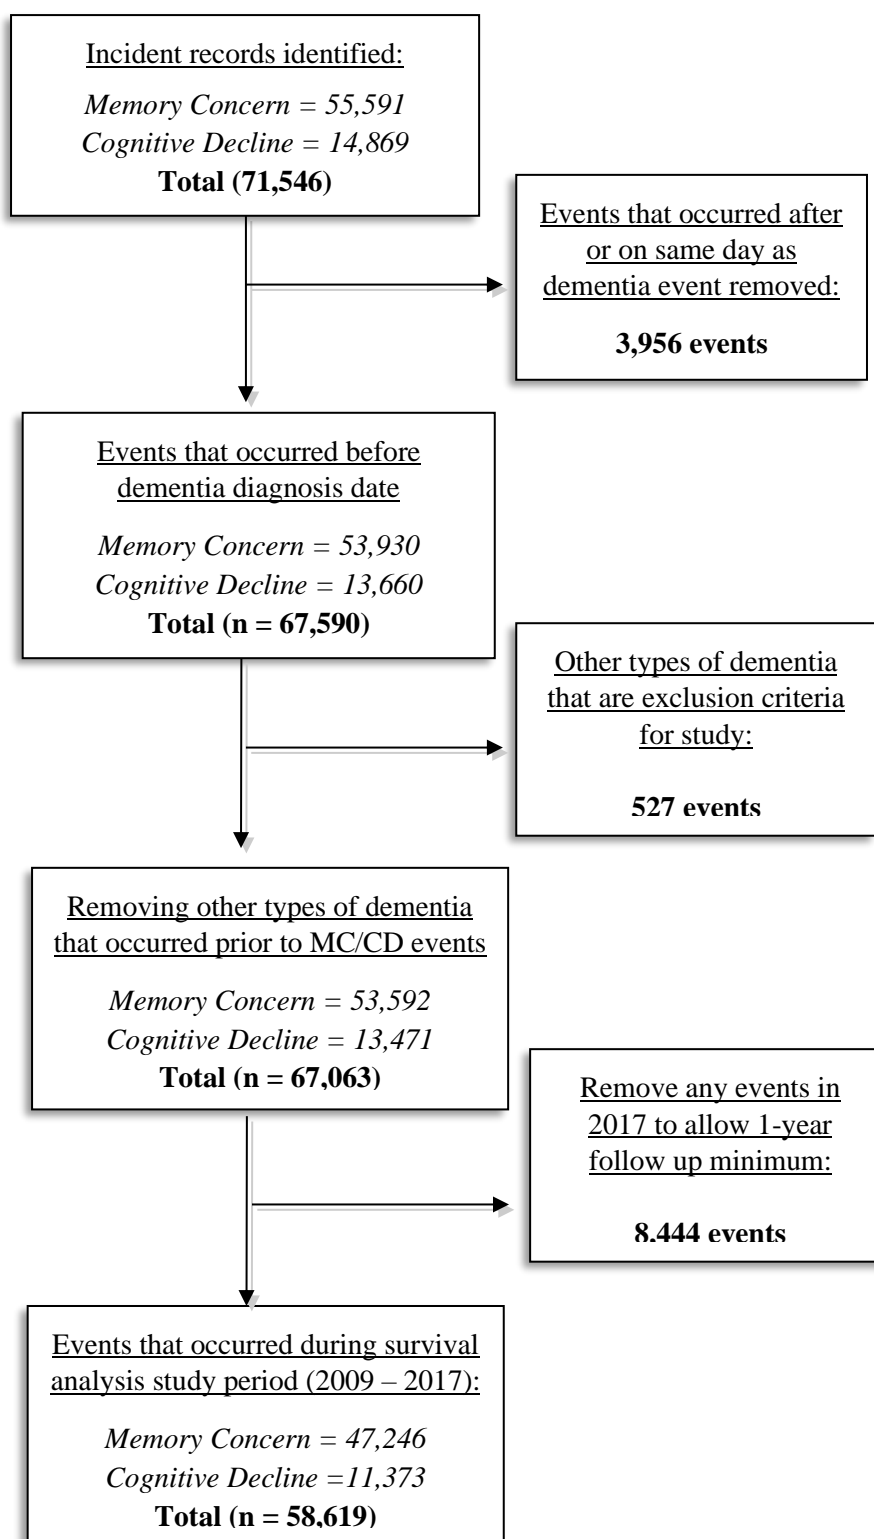

Supplement: Supplementary file 1 [file get_supplementary_file.php]
